# Supplementary material
Source: Springer Nature journal article supplement (https://www.springermedizin.de/resource/supplementary/12865_2006_93_MOESM7_ESM.pdf/9428562)
Supplement: MOESM7 [file 9428562]

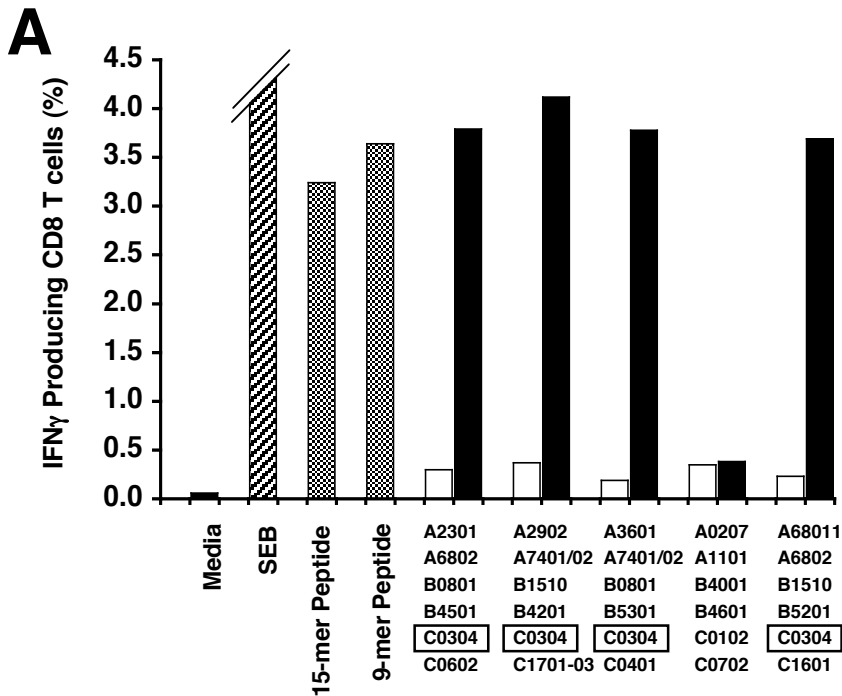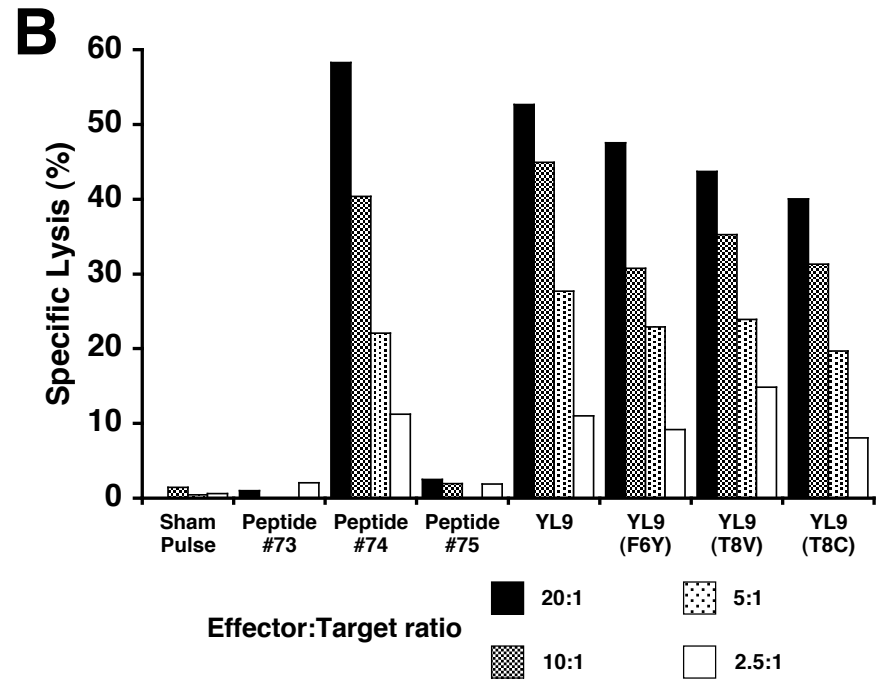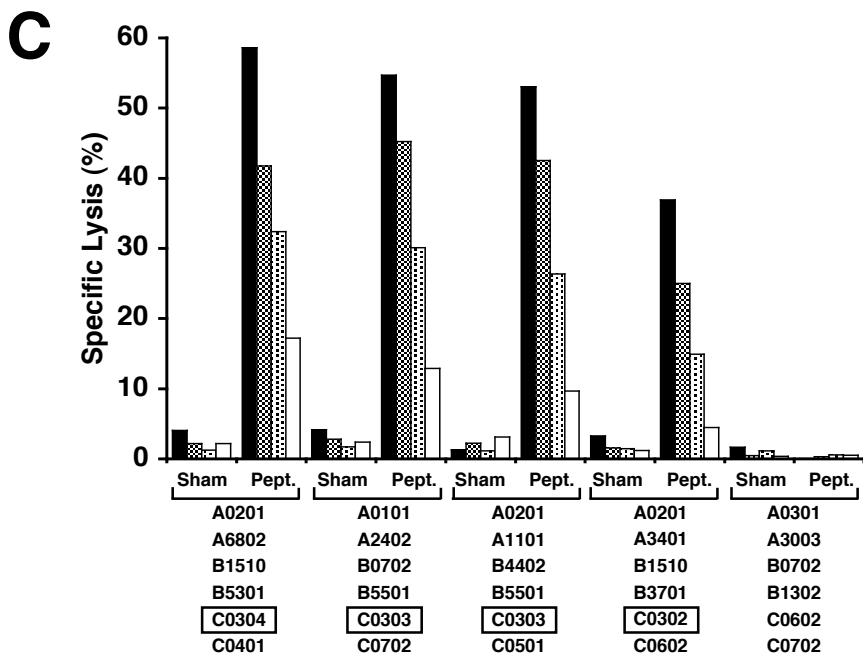

**D**

| Peptide     | Sequence         | Occurrences in Cohort |
|-------------|------------------|-----------------------|
| Peptide #73 | PKEPFRDYVDRFFKT  |                       |
| Peptide #74 | FRDYVDRFFKTLRAE  |                       |
| Peptide #75 | VDRFFKTLRAEQATQ  |                       |
| YL9         | <b>YVDRFFKTL</b> | 22/40                 |
| YL9 (F6Y)   | YVDRFYKTL        | 5/40                  |
| YL9 (T8V)   | YVDRFFKVL        | 5/40                  |
| YL9 (T8C)   | YVDRFFKCL        | 2/40                  |
